# Supplementary material for: Deciphering the influence of Y12L and N17H substitutions on the conformation and oligomerization of human calcitonin
Source: Royal Society of Chemistry journal article supplement (doi:10.1039/d3sm01332d), 2023-12-18
Supplement: d3sm01332d1.pdf [file d3sm01332d1.pdf]

## Supporting Information

### Deciphering the Influence of Y12L and N17H Substitutions on the Conformation and Oligomerization of Human Calcitonin

Jiajia Yan<sup>1,2</sup>, Ying Wang<sup>1</sup>, Xinjie Fan<sup>1</sup>, Yu Zou<sup>3</sup>, Feng Ding<sup>4\*</sup>, Fengjuan Huang<sup>2\*</sup>,  
Yunxiang Sun<sup>1,4\*</sup>

1. School of Physical Science and Technology, Ningbo University, Ningbo 315211, China
2. Ningbo Institute of Innovation for Combined Medicine and Engineering (NIIME), Ningbo Medical Center Lihuili Hospital, Ningbo 315211, China
3. Department of Sport and Exercise Science, Zhejiang University, Hangzhou 310058, China
4. Department of Physics and Astronomy, Clemson University, Clemson, SC 29634, United States

\*E-mail: [fding@clemson.edu](mailto:fding@clemson.edu), [hfy\\_1130@163.com](mailto:hfy_1130@163.com), [sunyunxiang@nbu.edu.cn](mailto:sunyunxiang@nbu.edu.cn)

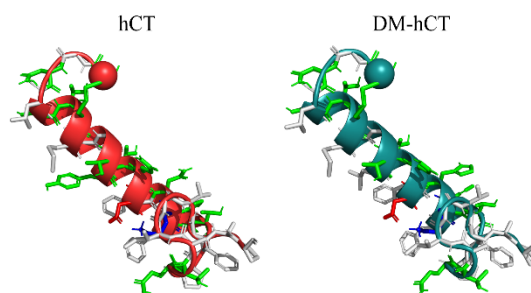

**Fig. S1. The initial structures of hCT and DM-hCT monomers.** The initial structures of the hCT monomer (left panel) and DM-hCT monomer (right panel) used in our simulation are constructed using PyMol mutagenesis based on the NMR-characterized phCT monomer structure (PDBid: 2jxz). Side-chains of each peptide are shown as sticks and colored by residue type: hydrophobic residues (white), negatively charged residues (red), positively charged residues (blue), and polar residues (green). The N-terminal C $\alpha$  atom is highlighted by a sphere for clarity. The N-terminal C $\alpha$  atom is highlighted by a sphere for clarity.

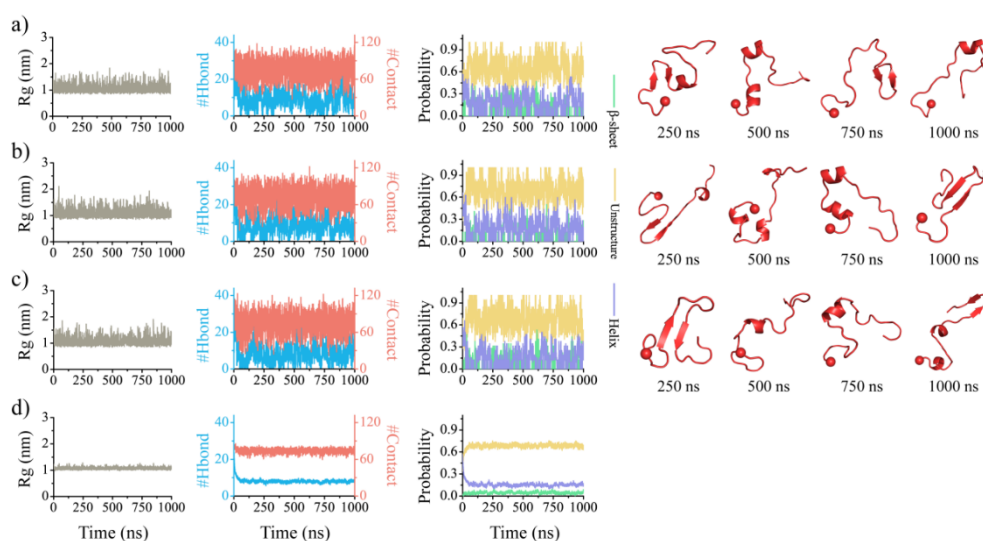

**Fig. S2. Equilibrium and convergence assessments of hCT monomer simulations.** Time evolution of key parameters, including radius of gyration (Rg), number of hydrogen bonds and contacts, and secondary structure content (comprising  $\beta$ -sheet, unstructured, and helix conformations), for three out of fifty independent DMD simulations of the hCT monomer **a-c**). Snapshots from each independent simulation are presented at 250 ns intervals. The averaged values of radius of gyration, number of hydrogen bonds and contacts, as well as the average content of each secondary structure across all fifty independent DMD simulations as a function of simulation time are shown **d**). The N-terminal C $\alpha$  atom is highlighted by a sphere for clarity.

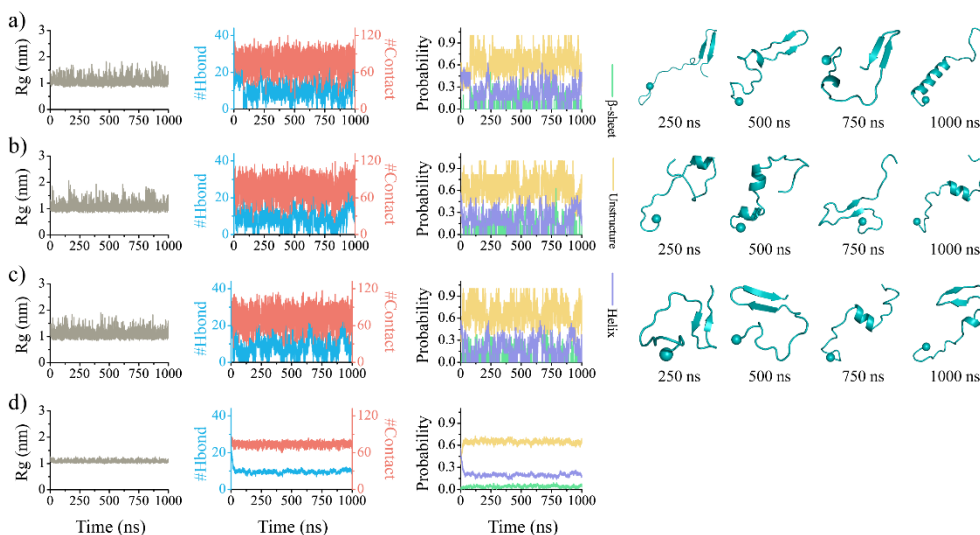

**Fig. S3. Equilibrium and convergence assessments of DM-hCT monomer simulations.** Time evolution of the radius of gyration, number of hydrogen bonds, and contacts, as well as the propensity of secondary structures (including  $\beta$ -sheet, unstructured, and helix conformations) for three out of fifty independent DMD simulations of the DM-hCT monomer **a-c**). Snapshots from each independent DMD trajectory are presented at 250 ns intervals. The averaged values of radius of gyration, number of hydrogen bonds and contacts, as well as the average content of each secondary structure across all fifty independent DMD simulations as a function of simulation time are shown **d**). The N-terminal  $C\alpha$  atom is highlighted with a sphere for clarity.

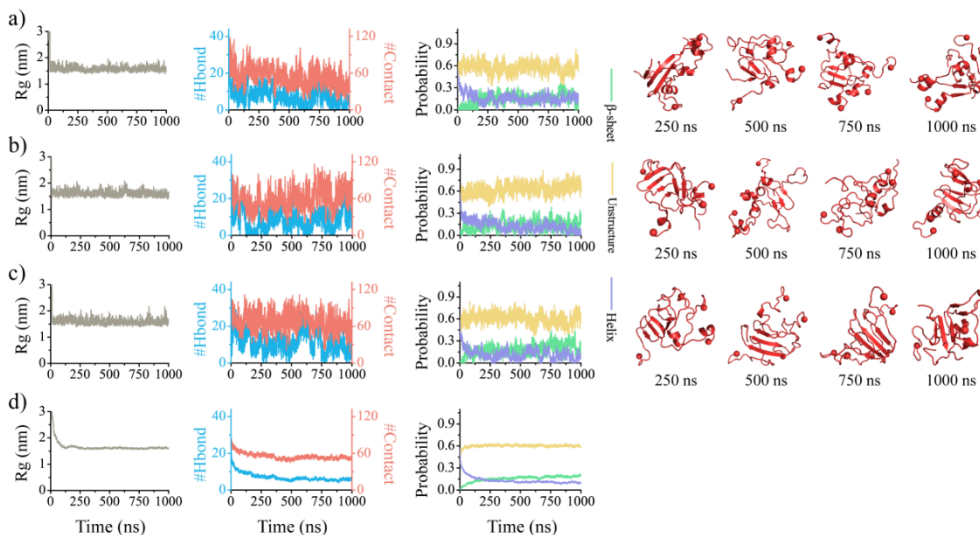

**Fig. S4. Equilibrium and convergence assessments for simulations of four hCT peptides.** Time evolution of radius of gyration, number of hydrogen bonds and contacts, and the content of each secondary structure (including  $\beta$ -sheet, unstructured, and helix) for three out of fifty independent DMD simulations of four hCT peptides **a-c**). Snapshots from each independent DMD trajectory are presented at 250 ns intervals. The averaged values of radius of gyration, number of hydrogen bonds and contacts, as well as the average content of each secondary structure across all fifty independent DMD simulations as a function of simulation time are shown **d**). The N-terminal  $C\alpha$  atom of each peptide is highlighted with a sphere for clarity.

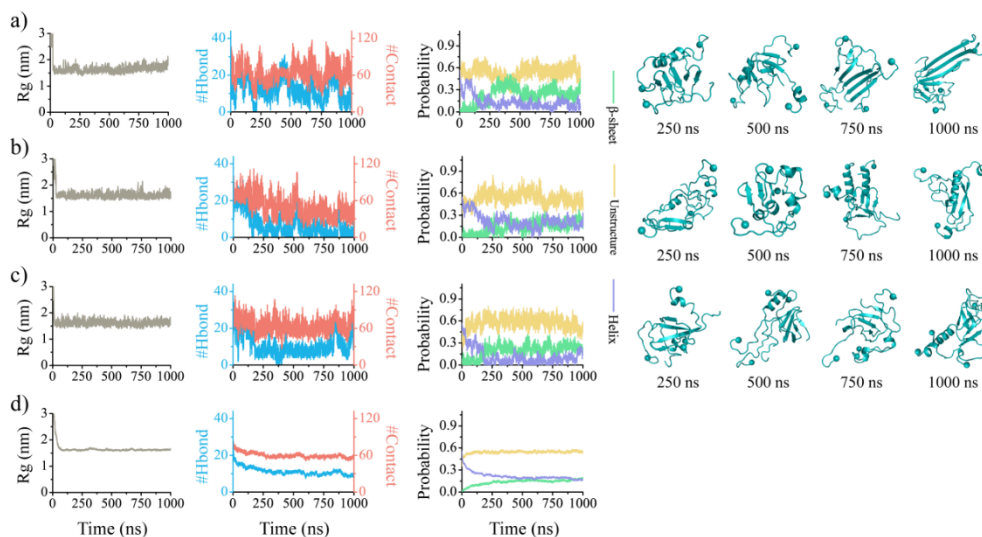

**Fig. S5. Equilibrium and convergence assessments for simulations of four DM-hCT peptides.** Time evolution of radius of gyration, number of hydrogen bonds and contacts, and the content of each secondary structure (including  $\beta$ -sheet, unstructured, and helix) for three out of fifty independent DMD simulations of four DM-hCT peptides **a-c**). Snapshots from each independent DMD trajectory are presented at 250 ns intervals. The averaged values of radius of gyration, number of hydrogen bonds and contacts, as well as the average content of each secondary structure across all fifty independent DMD simulations as a function of simulation time are shown **d**). The N-terminal  $C\alpha$  atom of each peptide is highlighted with a sphere for clarity.
